# Supplementary material
Source: Springer Nature journal article supplement (https://www.springermedizin.de/resource/supplementary/12889_2013_5549_MOESM5_ESM.pdf/9495640)
Supplement: MOESM5 [file 9495640]

| Drug use categories           | Origin of medicines (n= 12,587*) |             |                    |              |             |                    |               |             |                    |
|-------------------------------|----------------------------------|-------------|--------------------|--------------|-------------|--------------------|---------------|-------------|--------------------|
|                               | Prescribed                       |             |                    | OTC          |             |                    | Other sources |             |                    |
|                               | n                                | %           | 95%CI              | n            | %           | 95%CI              | n             | %           | 95%CI              |
| <b>Off-label medicine use</b> | <b>2,344</b>                     | <b>29.9</b> | <b>(28.9-30.9)</b> | <b>925</b>   | <b>30.3</b> | <b>(28.7-31.9)</b> | <b>515</b>    | <b>30.6</b> | <b>(28.5-32.9)</b> |
| ➤ Indication                  | 376                              | 4.8         | (4.3-5.2)          | 106          | 3.5         | (2.9-4.2)          | 56            | 3.3         | (2.6-4.3)          |
| ➤ Age                         | 326                              | 4.2         | (3.7-4.6)          | 100          | 3.3         | (2.7-4.0)          | 45            | 2.7         | (2.0-3.6)          |
| ➤ Under-dosing                | 1,263                            | 16.1        | (15.3-16.9)        | 590          | 19.3        | (18.0-20.8)        | 339           | 20.2        | (18.3-22.2)        |
| ➤ Over-dosing                 | 379                              | 4.8         | (4.4-5.3)          | 129          | 4.2         | (3.6-5.0)          | 75            | 4.5         | (3.6-5.6)          |
| <b>In-label medicine use</b>  | <b>5,508</b>                     | <b>70.1</b> | <b>(69.1-71.1)</b> | <b>2,129</b> | <b>69.7</b> | <b>(68.1-71.3)</b> | <b>1,166</b>  | <b>69.4</b> | <b>(67.1-71.5)</b> |

\* Discrepancy to total n = 12,667 because of missing data (n = 80)
